# Supplementary material
Source: HighWire-hosted journal article supplement (https://bmjopen.bmj.com/content/15/1/e087122)
Supplement: inline-supplementary-material-2 [file inline-supplementary-material-2.pdf]

Supplementary File 2

|                                                                          |  |
|--------------------------------------------------------------------------|--|
| Extraction Template                                                      |  |
| TITLE                                                                    |  |
| AUTHOR                                                                   |  |
| PUBLICATION and DATE e.g.,<br>Journal                                    |  |
| SOURCE e.g., database found                                              |  |
| EVIDENCE TYPE e.g.,<br>Qualitative                                       |  |
| STUDY Question & Aim                                                     |  |
| DISEASE INCLUSION (e.g., UA<br>only or combined UA and<br>endometriosis) |  |
| CONCEPTIONAL<br>DEFINITIONS                                              |  |
| FINDINGS / THEMES                                                        |  |
| CONCLUSION                                                               |  |
| Sample size - Population                                                 |  |
| Demographics - Population                                                |  |
| Means of Diagnosis -<br>Population                                       |  |
| race/ethnicity - Population                                              |  |
|                                                                          |  |
| Methodological approach -<br>Concept                                     |  |
| Method of data collection -<br>Concept                                   |  |
| Factors investigated or identified<br>- Concept                          |  |
| Impacts of disease - Concept                                             |  |

|                                                                           |  |
|---------------------------------------------------------------------------|--|
| Perceptions of diagnostic journey - Concept                               |  |
|                                                                           |  |
| Origin of study (geography) - Context                                     |  |
| Study setting e.g., community or clinic -Context                          |  |
| Means of recruitment and setting e.g., local clinic on one week - Context |  |
| Means of data collection and setting - Context                            |  |
| Limitations                                                               |  |
