# Supplementary material
Source: HighWire-hosted journal article supplement (https://bmjopen.bmj.com/content/15/1/e087122)
Supplement: inline-supplementary-material-4 [file inline-supplementary-material-4.pdf]

| Reference                                                                                     | Design                                    | Disease Focus                                                    | Study Aim                                                                                                                                                                                                                                                                                                  | Conceptual Definitions                                                                                                                            | Key Findings - Impact of Disease Q1                                                                                                                                                                                                                                                                                                                                             | Perceptions of Diagnostic Journey Q2                                                                                                                                            |
|-----------------------------------------------------------------------------------------------|-------------------------------------------|------------------------------------------------------------------|------------------------------------------------------------------------------------------------------------------------------------------------------------------------------------------------------------------------------------------------------------------------------------------------------------|---------------------------------------------------------------------------------------------------------------------------------------------------|---------------------------------------------------------------------------------------------------------------------------------------------------------------------------------------------------------------------------------------------------------------------------------------------------------------------------------------------------------------------------------|---------------------------------------------------------------------------------------------------------------------------------------------------------------------------------|
| <b>Alcalde et al, 2022</b><br><br><b>Part 1 only of a 2-part project.</b><br><br><b>SPAIN</b> | Survey Research<br><br>QUANT              | Adenomyosis (AD) and Deep Infiltrating Endometriosis (DIE)       | To evaluate the overall and sexual quality of life, sexual desire and pain symptoms in women with DIE and women with DIE + AD (and the influence of a flexible extended COC regimen in the long-term in these women).<br><br>(Pharmacological intervention aspects not applicable to this evidence review) | Lived experience not defined.<br><br>(HR)/QoL not defined.<br><br>(HR)QoL – Health Related Quality of Life                                        | DIE + AD group showed higher pain compared to DIE only and control groups.<br>DIE + AD and DIE groups lower HRQoL<br>DIE + AD group showed poorer sexual QoL compared to DIE only and control groups.                                                                                                                                                                           | NA                                                                                                                                                                              |
| <b>Dempsey, 2022</b><br><br><b>Part 2 only of a 3-part project.</b><br><br><b>PhD ENGLAND</b> | Participatory Action Research<br><br>QUAL | Adenomyosis (AD) and Endometriosis (Endo)<br><br>As 1 population | To conduct a needs assessment to inform the development of a complex psychological intervention for people living with endometriosis and/or adenomyosis.<br><br>Q: What are the <u>psychological</u> needs and <u>coping strategies</u> of those living with endometriosis and/or adenomyosis?             | Lived experience not defined.<br><br>Quality of Life (QoL) - The standard of health, comfort and happiness experienced by an individual or group. | Seven needs, thirteen unmet needs (and fifteen coping strategies) identified.<br><br>Complex pattern of interconnected physical and psychological needs, adversely impacting on QoL with acknowledgment of the impact of different lived experiences = differing impact on QoL.<br>Dismissive attitudes / not believing / poor understanding causes isolation, fear for future. | Not explicitly explored.<br>- experienced misdiagnosis, being dismissed, and not believed and as a result felt that they often must provide evidence of symptoms and diagnosis. |
| <b>Omtvedt et al, 2022</b><br><br><b>NORWAY</b>                                               | Mixed method survey<br><br>MIXED          | Adenomyosis (AD) and Endometriosis (Endo)<br><br>As 1 population | Aim: to find out what patients and relatives consider to be the best possible care in terms of multidisciplinary endometriosis and adenomyosis management and potential development of an                                                                                                                  | Lived experience not defined.<br><br>(HR)/QoL not defined.                                                                                        | Multidisciplinary care was a key issue for the majority, with<br>- a need for a psychologist, a nutritionist, a physiotherapist, and a sex therapist.                                                                                                                                                                                                                           | NA                                                                                                                                                                              |

|                                              |                                                           |                  |                                                                                                                                                                                                                            |                                                            |                                                                                                                                                                                                                                                                                                                                                                                                                                                                                                                                                                         |                                                                                                   |
|----------------------------------------------|-----------------------------------------------------------|------------------|----------------------------------------------------------------------------------------------------------------------------------------------------------------------------------------------------------------------------|------------------------------------------------------------|-------------------------------------------------------------------------------------------------------------------------------------------------------------------------------------------------------------------------------------------------------------------------------------------------------------------------------------------------------------------------------------------------------------------------------------------------------------------------------------------------------------------------------------------------------------------------|---------------------------------------------------------------------------------------------------|
|                                              |                                                           |                  | endometriosis centre, to prioritize resources towards the most needed aspects.<br>Assumed Q:<br>What do patients and relatives consider to be the best possible care in terms management of endometriosis and adenomyosis? |                                                            | The qualitative analysis of free text answers revealed a great need for<br>- updated and easily accessible information<br>- competent health care professionals<br>- respect and being taken seriously/listened to                                                                                                                                                                                                                                                                                                                                                      |                                                                                                   |
| <b>Nelsen et al, 2018</b><br><br><b>USA</b>  | Qualitative, cross-sectional, descriptive study           | Adenomyosis (AD) | Interviews were conducted to characterize the symptoms and impact of adenomyosis.<br><br>Assumed Q:<br>What are the symptoms and impact of adenomyosis?                                                                    | Lived experience not defined.<br><br>(HR)/QoL not defined. | More than 50 different symptoms of adenomyosis were reported; the most common of which were:<br>- heavy menstrual bleeding (87%)<br>- cramps (84%)<br>- blood clots during menstrual bleeding (84%)<br>- bloating (55%)<br>- and low energy/fatigue (52%)<br><br>More than 30 <u>impacts</u> of adenomyosis were reported; the most common were:<br>- burdensome self-care hygiene (71%)<br>- fatigue/low energy (71%)<br>- impacts on leisure/social activities (65%)<br>- household/activities of daily living (61%)<br>- travel (61%)<br>- physical activities (61%) | NA                                                                                                |
| <b>Huang et al, 2021</b><br><br><b>CHINA</b> | Phenomenological qualitative methodology (Colaizzi's even | Adenomyosis (AD) | Research Q: "What barriers to self-management do patients with adenomyosis have and what requirements do they want?"                                                                                                       | Lived experience not defined.<br><br>(HR)/QoL not defined. | Four themes were identified:<br>- lack of disease knowledge<br>- challenges and dilemmas of daily life<br>- multidimensional negative emotions<br>- personalised supporting                                                                                                                                                                                                                                                                                                                                                                                             | Not explicitly explored.<br>- most patients did not know about AD before diagnosis, and they were |

|                                  |                          |                  |                                                                                                                                                                                         |                                                            |                                                                                                                                                                                                                                                                                                                                                                                                                                                                                                                                  |                                                                                                         |
|----------------------------------|--------------------------|------------------|-----------------------------------------------------------------------------------------------------------------------------------------------------------------------------------------|------------------------------------------------------------|----------------------------------------------------------------------------------------------------------------------------------------------------------------------------------------------------------------------------------------------------------------------------------------------------------------------------------------------------------------------------------------------------------------------------------------------------------------------------------------------------------------------------------|---------------------------------------------------------------------------------------------------------|
|                                  | steps)                   |                  |                                                                                                                                                                                         |                                                            | requirements.<br><br>Described as challenges and dilemmas of daily life – these are ‘closely related to symptoms and complications’: <ul style="list-style-type: none"><li>- sleep disturbance</li><li>- sexual dissatisfaction</li><li>- disruption in social activities</li><li>- changes of appearance and original roles</li></ul>                                                                                                                                                                                           | unable to recognise the relationship between dysmenorrhea and AD, only 16.7% patients went to a doctor. |
| Alcalde et al, 2021<br><br>SPAIN | Survey Research<br>QUANT | Adenomyosis (AD) | To assess the impact of UA on different aspects of women’s psychological health<br><br>HRQoL work productivity estimates its effects in terms of a potential increase in indirect costs | Lived experience not defined.<br><br>(HR)/QoL not defined. | With UA compared to those without UA <ul style="list-style-type: none"><li>- significantly lower scores in all domains of the SF-36 questionnaire</li><li>- mean (SD) higher scores in the HADS questionnaire for anxiety and depression.</li><li>- Significant differences (<math>p &lt; 0.001</math>) in percentages of absenteeism, presenteeism, overall work productivity loss, and activity impairment (55.7% vs. 9.9%).</li><li>- The presence of AD was associated with higher yearly estimated indirect costs</li></ul> | NA                                                                                                      |
